# Supplementary material
Source: PubMed Central journal article supplement (PMC8409434)
Supplement: ehp8831.s001.acco.pdf [file ehp8831.s001.acco.pdf]

**Note to readers with disabilities:** *EHP* strives to ensure that all journal content is accessible to all readers. However, some figures and Supplemental Material published in *EHP* articles may not conform to [508 standards](#) due to the complexity of the information being presented. If you need assistance accessing journal content, please contact [ehp508@niehs.nih.gov](mailto:ehp508@niehs.nih.gov). Our staff will work with you to assess and meet your accessibility needs within 3 working days.

### **Supplemental Material**

#### **Changes in Latina Women's Exposure to Cleaning Chemicals Associated with Switching from Conventional to "Green" Household Cleaning Products: The LUCIR Intervention Study**

Kim G. Harley, Lucia Calderon, James E.S. Nolan, Randy Maddalena, Marion Russell, Katherine Roman, Stephanie Mayo-Burgos, Jessica Cabrera, Norma Morga, and Asa Bradman

#### **Table of Contents**

**Table S1.** "Green" products provided to participants by researchers, LUCIR Study, Salinas, California, 2019.

**Table S2.** Distribution of personal air concentrations of select VOCs ( $\mu\text{g}/\text{m}^3$ ) and SVOCs ( $\text{ng}/\text{m}^3$ ) among women using regular cleaning products (pre-intervention visit) and green cleaning products (post-intervention visit), LUCIR Study, Salinas, California, 2019.

**Table S3.** Most frequently used cleaning products among participants in pre-intervention visit, LUCIR Study, Salinas, California, 2019.

Table S1. "Green" products provided to participants by researchers, LUCIR Study, Salinas, California, 2019

| Brand Name         | Product Name                         | Scent                 | Participant use in<br>post-intervention visit<br>n (%) |
|--------------------|--------------------------------------|-----------------------|--------------------------------------------------------|
| Open Nature        | All-Purpose Cleaner                  | Lemon                 | 41 (82)                                                |
| Method             | All-Purpose Cleaner                  | Lavender              | 43 (86)                                                |
| Seventh Generation | Toilet Bowl Cleaner                  | Emerald Cypress & Fir | 45 (90)                                                |
| Bon Ami            | Powder Cleaner                       |                       | 32 (64)                                                |
| Open Nature        | Cleaning Wipes                       | Unscented             | 23 (46)                                                |
| Seventh Generation | Dish Soap                            | Free and Clear        | 38 (76)                                                |
|                    | Homemade Window Cleaner <sup>a</sup> |                       | 37 (74)                                                |

<sup>a</sup> Made with tap water, white vinegar, and Seventh Generation Dish Soap "Free and Clear"

Table S2. Distribution of personal air concentrations of select VOCs ( $\mu\text{g}/\text{m}^3$ ) and SVOCs ( $\text{ng}/\text{m}^3$ ) among women using regular cleaning products (pre-intervention visit) and green cleaning products (post-intervention visit), LUCIR Study, Salinas, California, 2019

| Chemical                                      | MDL  | Pre-Intervention Visit (N=50) |      |       |       |       |        | Post-Intervention Visit (N=49-50) |      |       |       |       |        |
|-----------------------------------------------|------|-------------------------------|------|-------|-------|-------|--------|-----------------------------------|------|-------|-------|-------|--------|
|                                               |      | DF (%)                        | 25th | 50th  | 75th  | 95th  | Max    | DF (%)                            | 25th | 50th  | 75th  | 95th  | Max    |
| <u>Volatile Organic Compounds</u>             |      |                               |      |       |       |       |        |                                   |      |       |       |       |        |
| <u>(<math>\mu\text{g}/\text{m}^3</math>):</u> |      |                               |      |       |       |       |        |                                   |      |       |       |       |        |
| Halogenated hydrocarbons                      |      |                               |      |       |       |       |        |                                   |      |       |       |       |        |
| Chloroform <sup>a,b,c</sup>                   | 0.46 | 50 (100)                      | 0.26 | 3.62  | 12.87 | 52.15 | 397.95 | 49 (100)                          | 0.15 | 0.22  | 0.59  | 2.82  | 160.35 |
| Carbon tetrachloride <sup>a,c</sup>           | 0.11 | 50 (100)                      | 0.88 | 1.12  | 5.74  | 15.91 | 50.73  | 46 (94)                           | 0.75 | 0.84  | 0.92  | 1.36  | 2.53   |
| Dichloromethane <sup>a,c</sup>                | 2.31 | 48 (96)                       | 0.21 | 0.30  | 0.40  | 0.65  | 1.31   | 44 (90)                           | 0.19 | 0.27  | 0.36  | 0.59  | 0.66   |
| Trichloroethene <sup>a,b,c</sup>              | 0.05 | 4 (8)                         | ND   | ND    | ND    | 0.06  | 0.15   | 3 (6)                             | ND   | ND    | ND    | 0.01  | 0.17   |
| Tetrachloroethylene <sup>a,c</sup>            | 0.72 | 47 (94)                       | 0.03 | 0.03  | 0.07  | 0.39  | 1.12   | 43 (88)                           | 0.02 | 0.03  | 0.07  | 0.29  | 1.09   |
| 1,1-Dichloroethane <sup>a</sup>               | 0.06 | 3 (6)                         | ND   | ND    | ND    | 0.05  | 0.11   | 1 (2)                             | ND   | ND    | ND    | ND    | 0.07   |
| 1,2-Dichloroethane <sup>a</sup>               | 0.07 | 49 (98)                       | 0.13 | 0.32  | 0.89  | 1.85  | 4.68   | 39 (80)                           | 0.05 | 0.28  | 0.77  | 4.40  | 5.50   |
| Other                                         |      |                               |      |       |       |       |        |                                   |      |       |       |       |        |
| 1,4-Dioxane <sup>a</sup>                      | 0.09 | 50 (100)                      | 0.19 | 0.54  | 1.95  | 4.89  | 7.38   | 47 (96)                           | 0.13 | 0.32  | 0.76  | 1.24  | 3.48   |
| Naphthalene <sup>a,c</sup>                    | 0.22 | 50 (100)                      | 0.08 | 0.11  | 0.21  | 0.85  | 1.83   | 47 (96)                           | 0.05 | 0.09  | 0.13  | 0.39  | 0.76   |
| 2-Ethylhexanol <sup>c</sup>                   | 0.18 | 50 (100)                      | 1.26 | 2.21  | 5.41  | 24.49 | 48.93  | 46 (94)                           | 0.46 | 1.82  | 3.64  | 18.99 | 32.54  |
| TXIB/Kodaflex <sup>c</sup>                    | 0.36 | 47 (94)                       | 0.30 | 0.79  | 1.46  | 4.73  | 7.35   | 45 (92)                           | 0.18 | 0.71  | 1.43  | 4.91  | 5.98   |
| Benzene derivatives                           |      |                               |      |       |       |       |        |                                   |      |       |       |       |        |
| Benzene <sup>a,b,c</sup>                      | 0.46 | 50 (100)                      | 0.52 | 0.67  | 1.03  | 3.55  | 8.93   | 49 (100)                          | 0.36 | 0.63  | 0.91  | 2.22  | 4.23   |
| Toluene <sup>b,c</sup>                        | 0.51 | 50 (100)                      | 0.91 | 1.53  | 3.74  | 26.50 | 63.29  | 49 (100)                          | 1.11 | 1.69  | 3.16  | 20.77 | 36.29  |
| Ethylbenzene <sup>a,c</sup>                   | 0.61 | 50 (100)                      | 0.16 | 0.33  | 0.76  | 3.22  | 35.81  | 46 (94)                           | 0.11 | 0.25  | 0.48  | 3.26  | 3.96   |
| mpXylene <sup>c</sup>                         | 0.60 | 50 (100)                      | 0.46 | 0.89  | 1.76  | 12.31 | 175.03 | 47 (96)                           | 0.36 | 0.73  | 1.38  | 11.66 | 18.25  |
| oXylene <sup>c</sup>                          | 0.69 | 50 (100)                      | 0.14 | 0.33  | 0.62  | 4.04  | 65.97  | 46 (94)                           | 0.12 | 0.25  | 0.49  | 3.48  | 8.30   |
| Styrene <sup>a,c</sup>                        | 0.23 | 50 (100)                      | 0.57 | 0.84  | 1.36  | 4.78  | 9.62   | 47 (96)                           | 0.31 | 0.68  | 1.14  | 3.54  | 8.12   |
| Butylbenzene <sup>c</sup>                     | 0.19 | 48 (96)                       | 0.03 | 0.04  | 0.09  | 0.45  | 1.19   | 40 (82)                           | 0.01 | 0.04  | 0.09  | 0.25  | 0.45   |
| Nitrobenzene <sup>a,b,c</sup>                 | 1.20 | 39 (78)                       | 0.02 | 0.08  | 0.29  | 0.94  | 2.85   | 40 (82)                           | 0.02 | 0.11  | 0.27  | 0.89  | 1.24   |
| Phenol <sup>c</sup>                           | 0.28 | 48 (96)                       | 0.37 | 1.26  | 2.44  | 7.45  | 19.38  | 43 (88)                           | 0.23 | 0.86  | 1.64  | 2.73  | 4.12   |
| 1,4-Dichlorobenzene <sup>a</sup>              | 0.20 | 47 (94)                       | 0.02 | 0.04  | 0.11  | 17.94 | 39.06  | 39 (80)                           | 0.01 | 0.02  | 0.06  | 6.89  | 18.49  |
| Aldehydes                                     |      |                               |      |       |       |       |        |                                   |      |       |       |       |        |
| Formaldehyde <sup>a,c</sup>                   | 0.17 | 50 (100)                      | 9.55 | 14.14 | 25.19 | 48.20 | 76.00  | 50 (100) <sup>d</sup>             | 8.20 | 13.72 | 19.38 | 30.31 | 47.45  |
| Acetaldehyde <sup>a,c</sup>                   | 0.35 | 50 (100)                      | 8.62 | 13.61 | 27.59 | 67.54 | 613.15 | 49 (98) <sup>d</sup>              | 5.60 | 9.35  | 16.07 | 33.16 | 49.63  |

|                                                       |       |          |        |        |         |         |         |                       |        |        |         |         |        |
|-------------------------------------------------------|-------|----------|--------|--------|---------|---------|---------|-----------------------|--------|--------|---------|---------|--------|
| Benzaldehyde <sup>c</sup>                             | 0.33  | 49 (98)  | 1.69   | 3.40   | 5.60    | 18.95   | 28.18   | 46 (94)               | 0.86   | 2.08   | 4.01    | 16.70   | 57.77  |
| Hexaldehyde <sup>c</sup>                              | 1.15  | 50 (100) | 8.51   | 14.70  | 34.69   | 74.79   | 153.68  | 46 (94)               | 4.46   | 11.11  | 17.86   | 42.42   | 70.72  |
| Crotonaldehyde <sup>c</sup>                           | 0.39  | 18 (36)  | ND     | ND     | 3.28    | 6.65    | 10.95   | 8 (16) <sup>d</sup>   | ND     | ND     | ND      | 3.46    | 4.60   |
| Alkanes                                               |       |          |        |        |         |         |         |                       |        |        |         |         |        |
| Hexane <sup>b,c</sup>                                 | 2.74  | 50 (100) | 0.19   | 0.43   | 1.18    | 18.39   | 24.68   | 47 (96)               | 0.15   | 0.28   | 0.74    | 6.37    | 16.23  |
| Heptane <sup>c</sup>                                  | 0.46  | 50 (100) | 0.16   | 0.41   | 0.68    | 3.97    | 13.93   | 47 (96)               | 0.17   | 0.33   | 0.72    | 2.98    | 6.38   |
| Glycol Ethers                                         |       |          |        |        |         |         |         |                       |        |        |         |         |        |
| Diethylene glycol monobutyl ether (DGBE) <sup>c</sup> | 14.27 | 33 (66)  | ND     | 0.60   | 1.68    | 8.84    | 62.54   | 31 (63)               | ND     | 0.75   | 3.26    | 9.16    | 42.46  |
| Ethylene glycol monobutyl ether (EGBE) <sup>c</sup>   | 1.08  | 30 (60)  | ND     | 0.11   | 2.16    | 354.84  | 533.85  | 36 (73)               | ND     | 0.13   | 0.30    | 14.68   | 23.72  |
| Propylene glycol methyl ether (PGME) <sup>c</sup>     | 14.91 | 32 (64)  | ND     | 0.27   | 0.82    | 5.74    | 16.12   | 16 (33)               | ND     | ND     | 0.12    | 1.34    | 21.53  |
| Siloxanes                                             |       |          |        |        |         |         |         |                       |        |        |         |         |        |
| D4 <sup>c</sup>                                       | 0.10  | 50 (100) | 0.52   | 1.16   | 4.38    | 34.55   | 160.24  | 49 (100)              | 0.34   | 2.01   | 9.28    | 45.81   | 154.54 |
| D5 <sup>c</sup>                                       | 1.04  | 50 (100) | 3.08   | 17.39  | 90.51   | 124.94  | 135.85  | 48 (98)               | 5.19   | 24.24  | 107.96  | 152.76  | 381.51 |
| Alkylphenols                                          |       |          |        |        |         |         |         |                       |        |        |         |         |        |
| Nonylphenol <sup>c</sup>                              | 3.49  | 2 (4)    | ND     | ND     | ND      | ND      | 0.09    | 1 (2)                 | ND     | ND     | ND      | ND      | 0.01   |
| Octylphenol <sup>c</sup>                              | 3.08  | 4 (8)    | ND     | ND     | ND      | 0.01    | 0.02    | 9 (18)                | ND     | ND     | ND      | 0.02    | 0.08   |
| Terpenes                                              |       |          |        |        |         |         |         |                       |        |        |         |         |        |
| b-Myrcene <sup>a</sup>                                | 2.54  | 50 (100) | 0.72   | 1.84   | 3.70    | 24.26   | 57.32   | 47 (96)               | 2.78   | 6.70   | 19.95   | 32.63   | 43.50  |
| <u>Semi-Volatile Organic Compounds</u>                |       |          |        |        |         |         |         |                       |        |        |         |         |        |
| <u>(ng/m<sup>3</sup>):</u>                            |       |          |        |        |         |         |         |                       |        |        |         |         |        |
| Phthalates                                            |       |          |        |        |         |         |         |                       |        |        |         |         |        |
| Diethyl phthalate <sup>c</sup>                        | 22.62 | 50 (100) | 108.60 | 180.90 | 283.41  | 537.22  | 2130.73 | 50 (100) <sup>d</sup> | 112.30 | 156.99 | 242.35  | 656.17  | 2327.4 |
| Dibutyl phthalate <sup>b,c</sup>                      | 61.70 | 50 (100) | 59.58  | 89.89  | 102.45  | 130.84  | 267.89  | 50 (100) <sup>d</sup> | 61.94  | 72.53  | 105.40  | 158.60  | 172.19 |
| Diisobutyl phthalate <sup>c</sup>                     | 9.39  | 50 (100) | 79.34  | 126.88 | 181.69  | 516.02  | 1296.25 | 50 (100) <sup>d</sup> | 76.09  | 108.71 | 181.83  | 438.42  | 1263.9 |
| Nitro musks                                           |       |          |        |        |         |         |         |                       |        |        |         |         |        |
| Musk xylene <sup>c</sup>                              | 0.36  | 49 (98)  | 0.49   | 0.73   | 1.12    | 64.28   | 120.42  | 50 (100) <sup>d</sup> | 0.48   | 0.66   | 1.07    | 1.53    | 2.19   |
| Musk ketone <sup>c</sup>                              | 0.56  | 50 (100) | 1.14   | 1.74   | 4.26    | 37.44   | 107.50  | 50 (100) <sup>d</sup> | 0.97   | 1.99   | 5.38    | 26.01   | 87.95  |
| Polycyclic musks                                      |       |          |        |        |         |         |         |                       |        |        |         |         |        |
| Cashmeran (DPMI) <sup>c</sup>                         | 0.44  | 47 (94)  | 4.19   | 15.12  | 42.09   | 153.35  | 282.56  | 49 (98) <sup>d</sup>  | 5.54   | 12.80  | 39.28   | 105.59  | 290.88 |
| Celestolide (ADBI) <sup>c</sup>                       | 0.40  | 50 (100) | 1.62   | 2.96   | 5.60    | 17.80   | 65.87   | 50 (100) <sup>d</sup> | 2.05   | 3.34   | 7.01    | 31.32   | 67.66  |
| Phantolide (AHMI) <sup>c</sup>                        | 1.35  | 49 (98)  | 0.37   | 0.54   | 1.16    | 9.60    | 15.45   | 50 (100) <sup>d</sup> | 0.43   | 0.64   | 2.50    | 11.59   | 13.61  |
| Galaxolide (HHCB) <sup>c</sup>                        | 14.11 | 50 (100) | 354.96 | 646.15 | 1181.93 | 2886.91 | 5111.35 | 50 (100) <sup>d</sup> | 555.84 | 923.08 | 1738.31 | 3498.86 | 4533.0 |
| Tonalide (AHTN) <sup>c</sup>                          | 3.71  | 49 (98)  | 30.75  | 53.60  | 90.11   | 160.15  | 181.92  | 49 (98) <sup>d</sup>  | 31.41  | 58.89  | 97.22   | 246.45  | 300.72 |

Abbreviations: DF = Detection frequency; MDL = Method detection limit; ND = Not detected in instrumental analysis, DGBE = Diethylene glycol monobutyl ether, EGBE = Ethylene glycol monobutyl ether, PGME = Propylene glycol methyl ether, D4 = Octamethylcyclotetrasiloxane, D5 = Decamethylcyclopentasiloxane

<sup>a</sup> Prop 65 Carcinogen

<sup>b</sup> Prop 65 Reproductive/Developmental Toxicant

<sup>c</sup> Suspected EDC

<sup>d</sup> N=50

Table S3. Most frequently used cleaning products among participants in pre-intervention visit, LUCIR Study, Salinas, California, 2019

| Brand Name           | Product Name                                     | Scent               | Participant use in     |
|----------------------|--------------------------------------------------|---------------------|------------------------|
|                      |                                                  |                     | pre-intervention visit |
|                      |                                                  |                     | n (%)                  |
| Windex               | Glass Cleaner with Ammonia-D                     |                     | 13 (26)                |
| LA's Totally Awesome | All Purpose Cleaner, Degreaser & Spot Remover    |                     | 10 (20)                |
| Dawn                 | Ultra Dishwashing Liquid                         | Original            | 8 (16)                 |
| Dawn                 | Ultra Platinum Advanced Power Dishwashing Liquid | Fresh Scent         | 8 (16)                 |
| Clorox               | Clean Up Cleaner + Bleach                        | Original            | 7 (14)                 |
| Clorox               | Disinfecting Wipes                               | Crisp Lemon         | 6 (12)                 |
| Fabuloso             | All Purpose Cleaner                              | Lavender            | 6 (12)                 |
| Palmolive            | Ultra Dishwashing Liquid                         | Original            | 6 (12)                 |
| Ajax                 | Cleanser with Bleach                             |                     | 5 (10)                 |
| Ariel                | Laundry Detergent <sup>a</sup>                   | Original            | 5 (10)                 |
| Kleen King           | Stainless Steel & Copper Cleaner                 |                     | 5 (10)                 |
| Clorox               | Regular Bleach                                   |                     | 4 (8)                  |
| Comet                | Cleaner with Bleach                              |                     | 4 (8)                  |
| Lysol                | Power Toilet Bowl Cleaner                        |                     | 4 (8)                  |
| Pine Sol             | Multi Purpose Cleaner                            | Original            | 4 (8)                  |
| Ajax                 | Triple Action                                    | Orange              | 3 (6)                  |
| Dawn                 | Ultra Antibacterial Hand Soap                    | Apple Blossom Scent | 3 (6)                  |
| Easy Off             | Oven Cleaner, Heavy Duty                         |                     | 3 (6)                  |
| Lysol                | Kitchen Pro Antibacterial Cleanser               | Citrus              | 3 (6)                  |
| Windex               | Ammonia-Free Glass Cleaner                       | Crystal Rain        | 3 (6)                  |
| 409                  | Antibacterial All Purpose Cleaner                |                     | 2 (4)                  |
| 409                  | Multi-Surface Cleaner                            | Lemon Fresh         | 2 (4)                  |
| Bar Keepers Friend   | Cleanser & Polish                                |                     | 2 (4)                  |
| Clorox               | Clean-Up All-Purpose Cleaner                     | Fresh Scent         | 2 (4)                  |
| Clorox               | Toilet Bowl Cleaner Clinging Bleach Gel          | Cool Wave Scent     | 2 (4)                  |

<sup>a</sup> This powdered laundry detergent was used as a cleaning product.
