# Supplementary material
Source: PubMed Central journal article supplement (PMC8409434)
Supplement: ehp8831.smcontents.508.pdf [file ehp8831.smcontents.508.pdf]

**Note to readers with disabilities:** *EHP* strives to ensure that all journal content is accessible to all readers. However, some figures and Supplemental Material published in *EHP* articles may not conform to [508 standards](#) due to the complexity of the information being presented. If you need assistance accessing journal content, please contact [ehp508@niehs.nih.gov](mailto:ehp508@niehs.nih.gov). Our staff will work with you to assess and meet your accessibility needs within 3 working days.

### **Supplemental Material**

#### **Changes in Latina Women's Exposure to Cleaning Chemicals Associated with Switching from Conventional to "Green" Household Cleaning Products: The LUCIR Intervention Study**

Kim G. Harley, Lucia Calderon, James E.S. Nolan, Randy Maddalena, Marion Russell, Katherine Roman, Stephanie Mayo-Burgos, Jessica Cabrera, Norma Morga, and Asa Bradman

#### **Table of Contents**

**Table S1.** "Green" products provided to participants by researchers, LUCIR Study, Salinas, California, 2019.

**Table S2.** Distribution of personal air concentrations of select VOCs ( $\mu\text{g}/\text{m}^3$ ) and SVOCs ( $\text{ng}/\text{m}^3$ ) among women using regular cleaning products (pre-intervention visit) and green cleaning products (post-intervention visit), LUCIR Study, Salinas, California, 2019.

**Table S3.** Most frequently used cleaning products among participants in pre-intervention visit, LUCIR Study, Salinas, California, 2019.
